# Supplementary material for: Healthy Ageing: A Decision-Support Algorithm for the Patient-Specific Assignment of ICT Devices and Services
Source: MDPI journal article supplement (doi:10.3390/s23041836), 2023-02-07

## Supplementary Materials

**Figure S1** Decision-support algorithm for automatically assigning devices and services tailored to seniors' clinical and social needs. The algorithm's complexity requires it to be decomposed into six parts (i.e., images) to be represented. Still, it must be read as a single one. The 1-to-7 numbers in the small grey circles indicate the connections between subsequent parts of the same algorithm. They are just a trick to report the algorithm in its entirety and have no logical meaning. Legend: Orange ovals: start and end of the algorithm; pale blue rhombuses: decisional blocks; yellow parallelograms: output services (clinical or social); green parallelograms: output devices; orange rectangles: fall and cardiac monitoring. Abbreviations: Body Mass Index (BMI), Mini Nutritional Assessment (MNA), Adapted Physical Activity (APA), Pacemaker (PMK), Defibrillator (DFB), Chronic Renal Insufficiency (CRI).

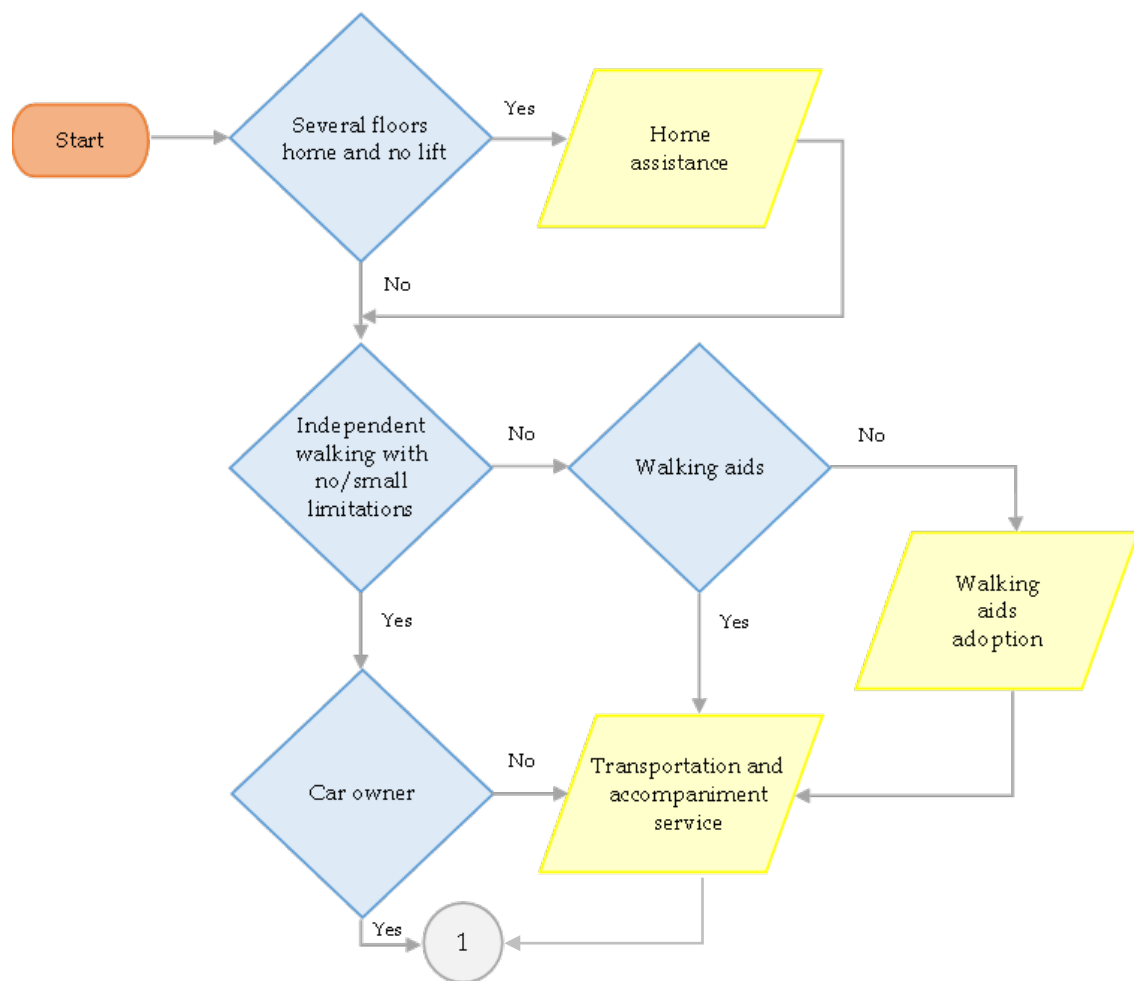

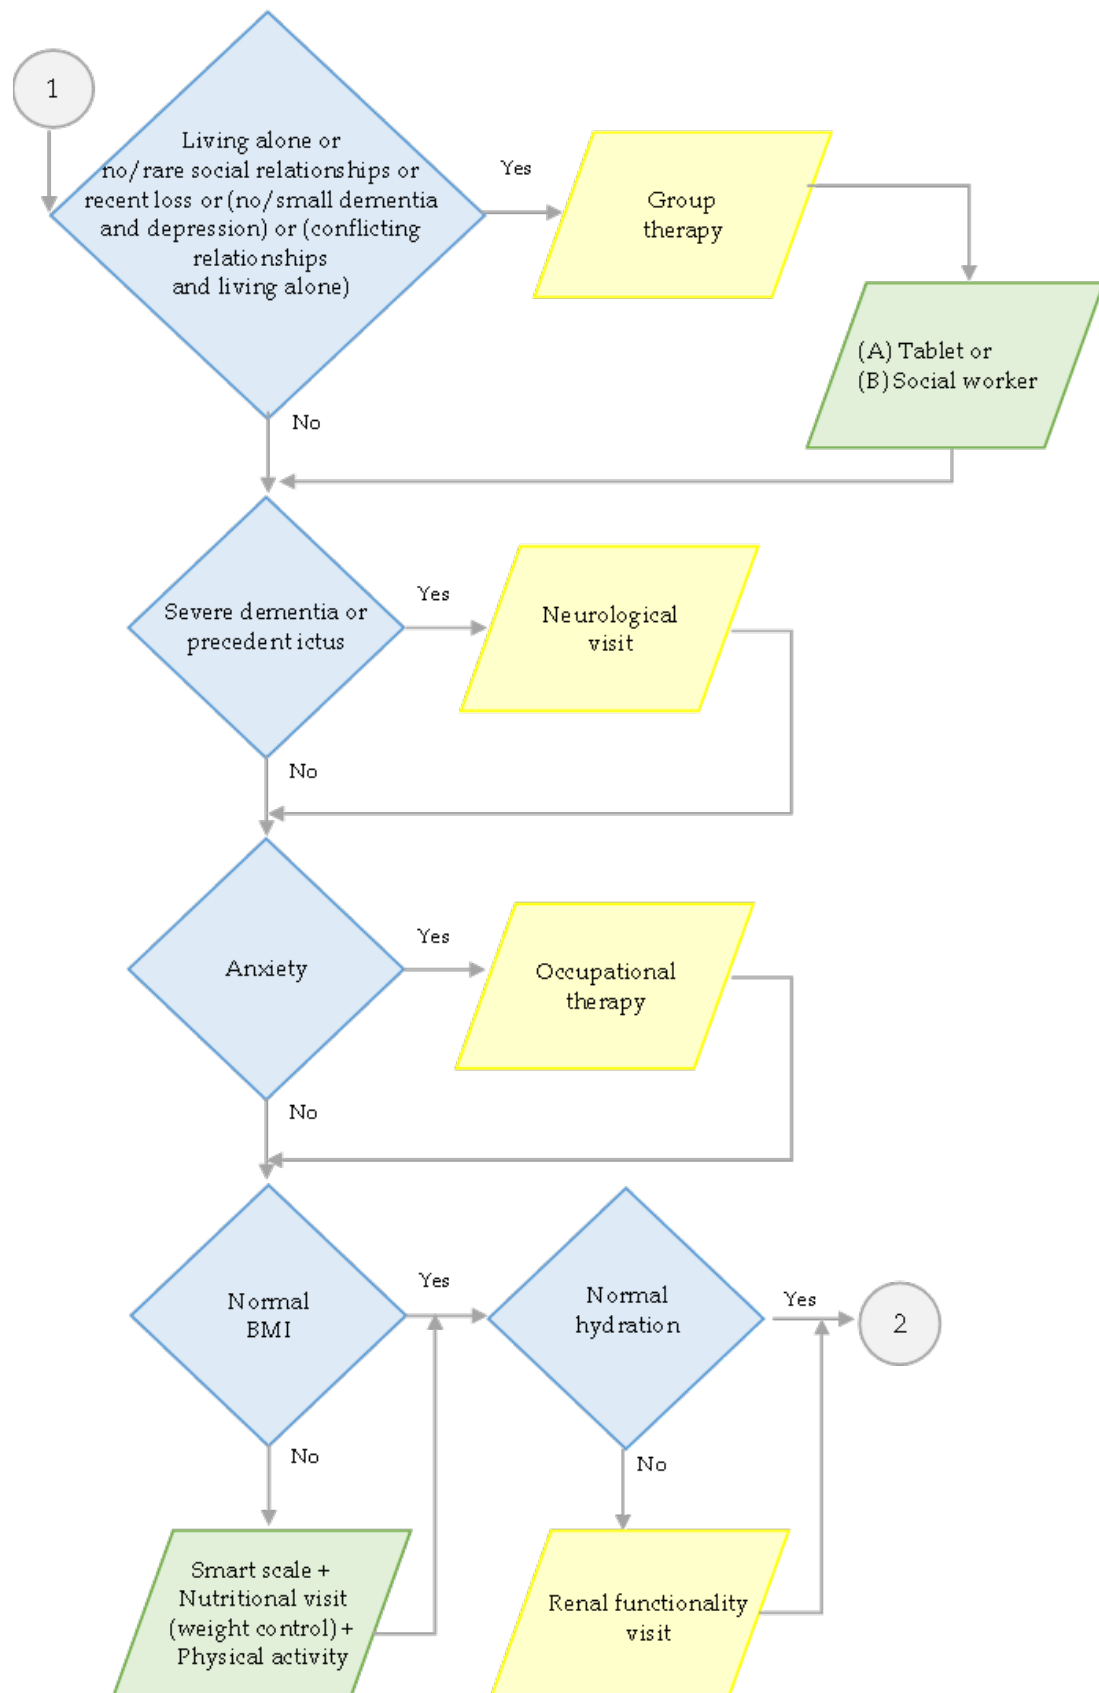

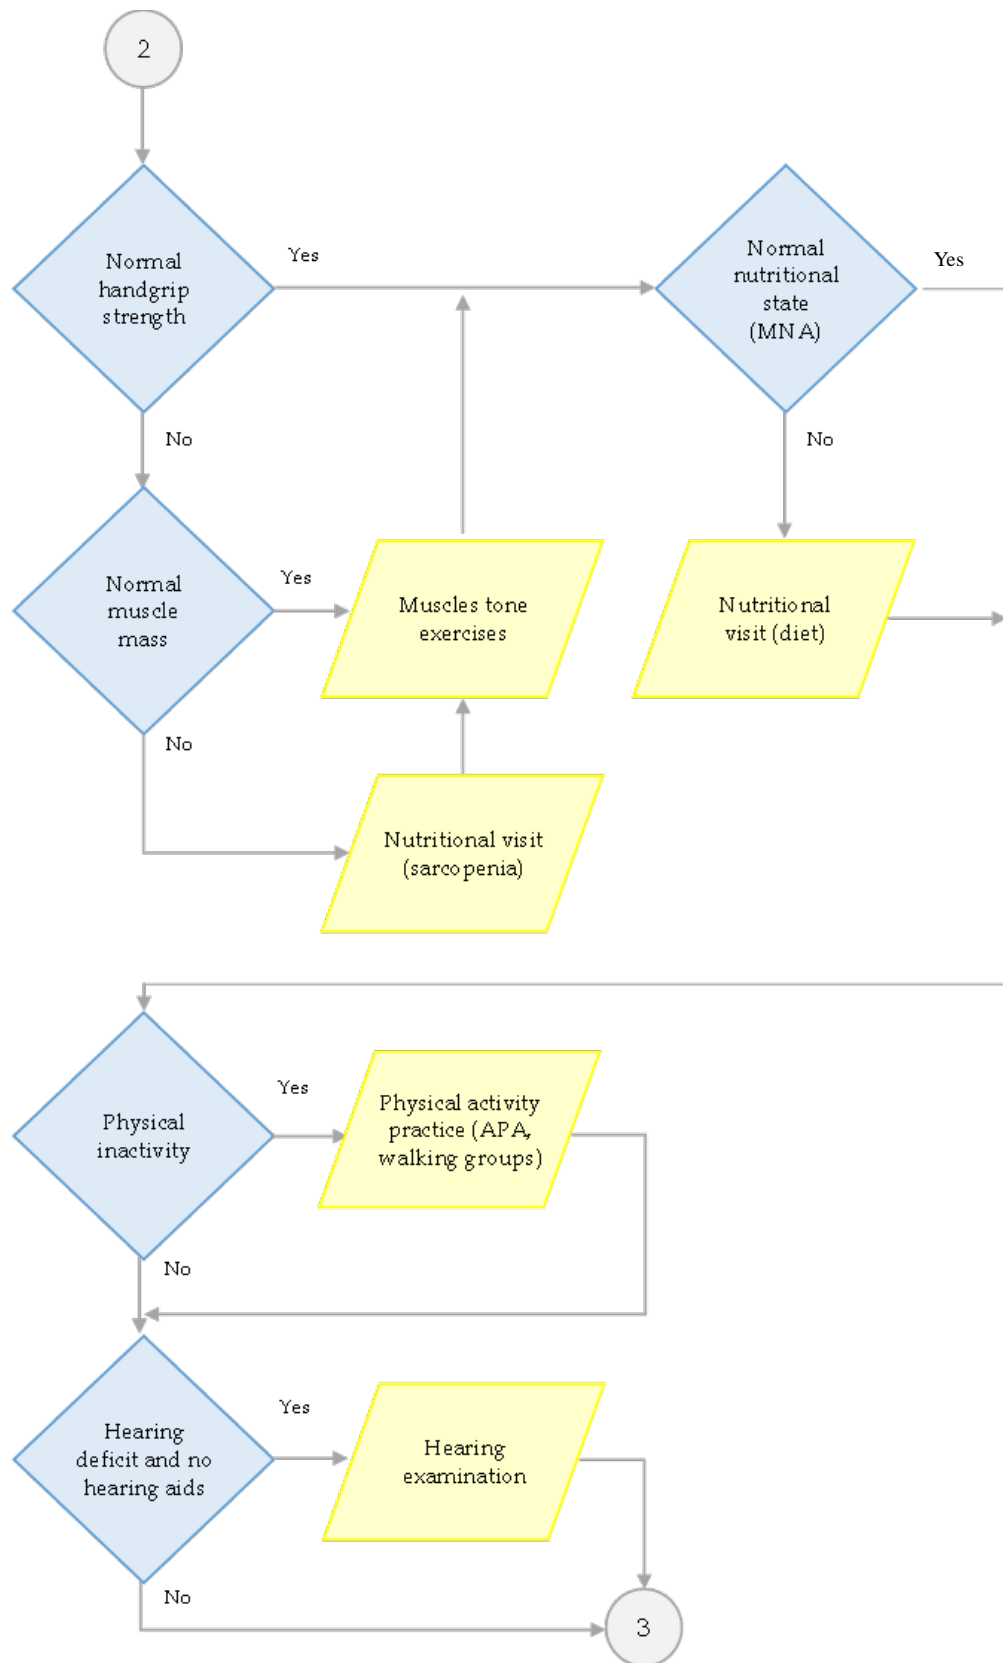

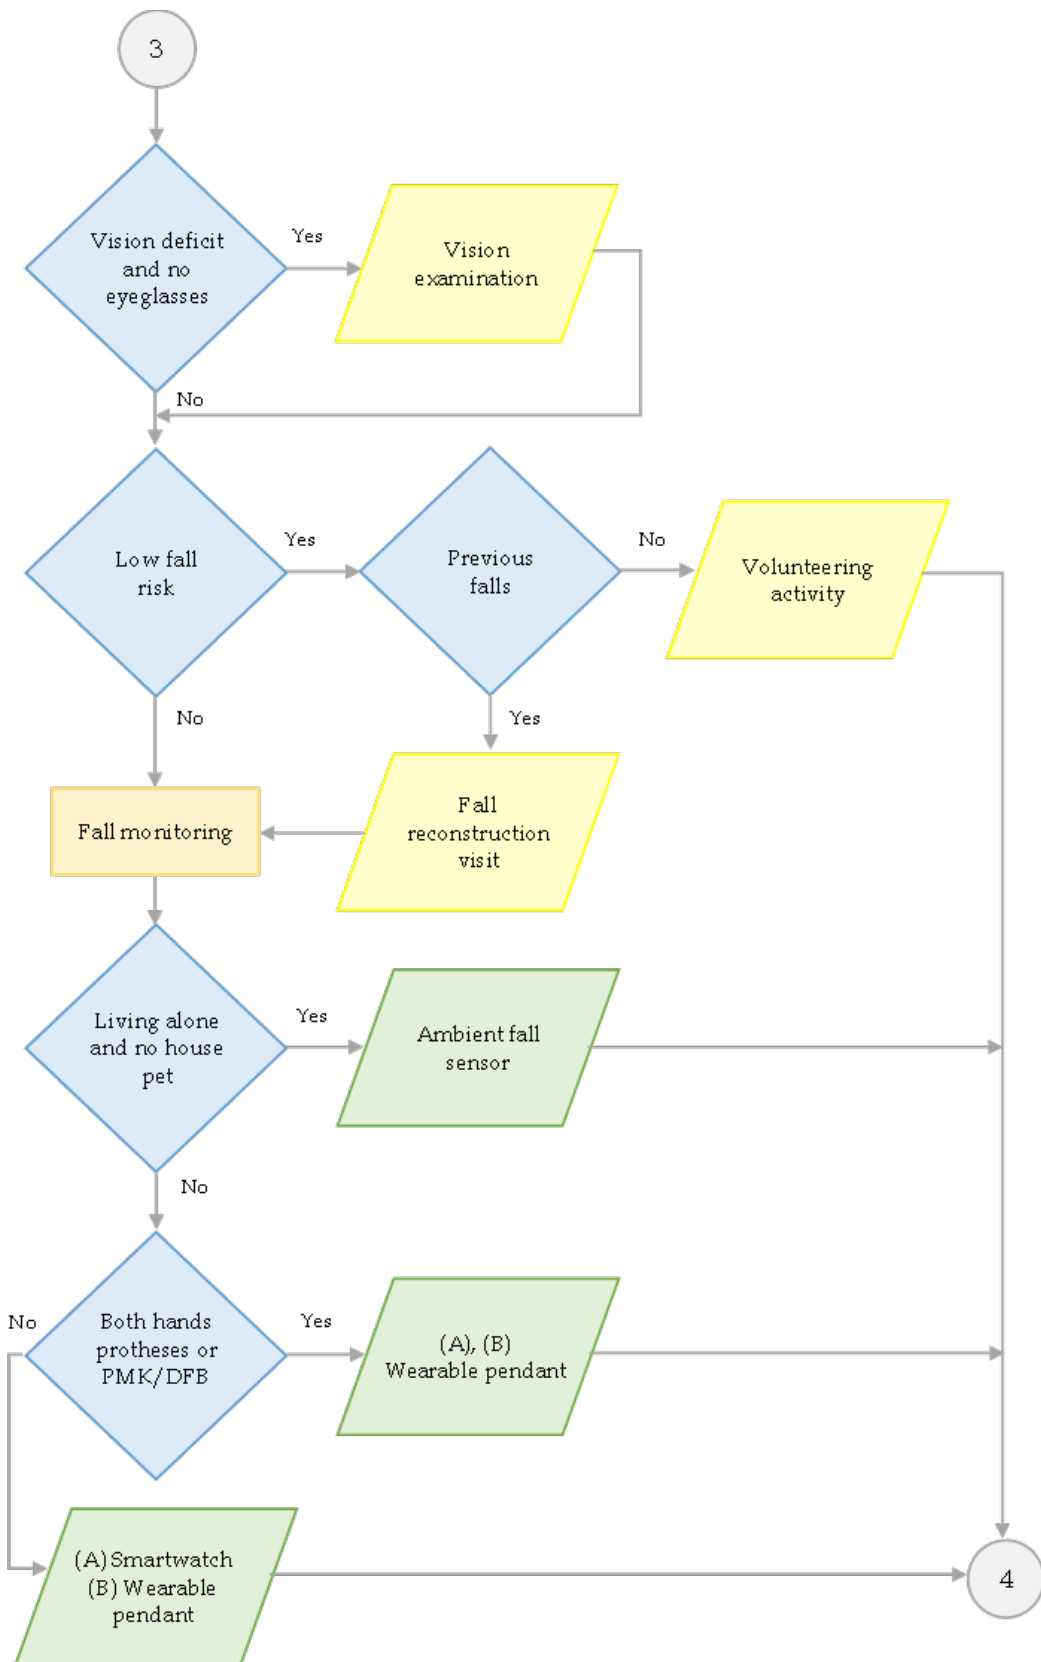

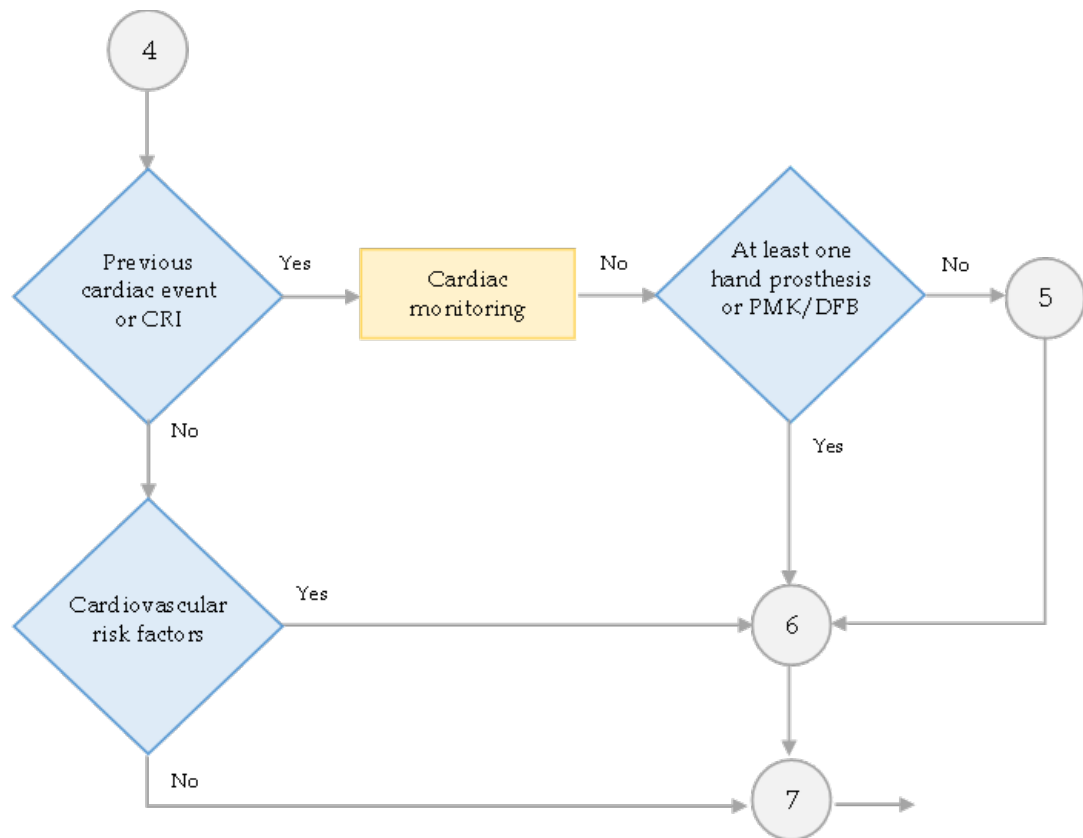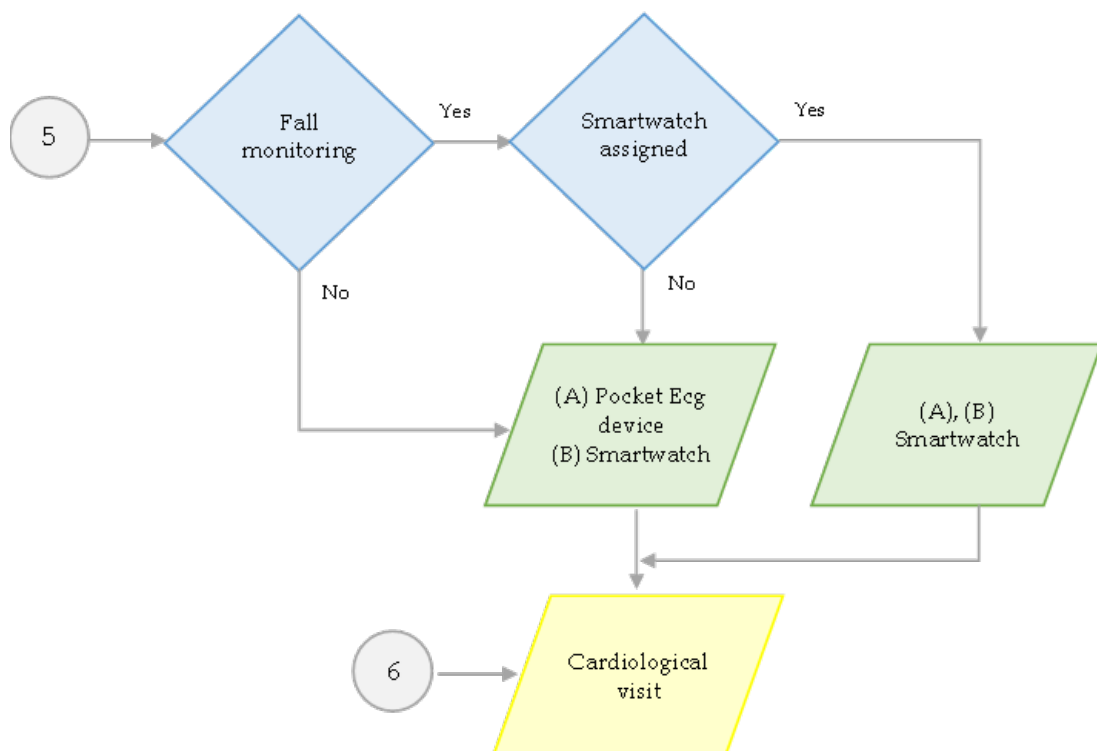

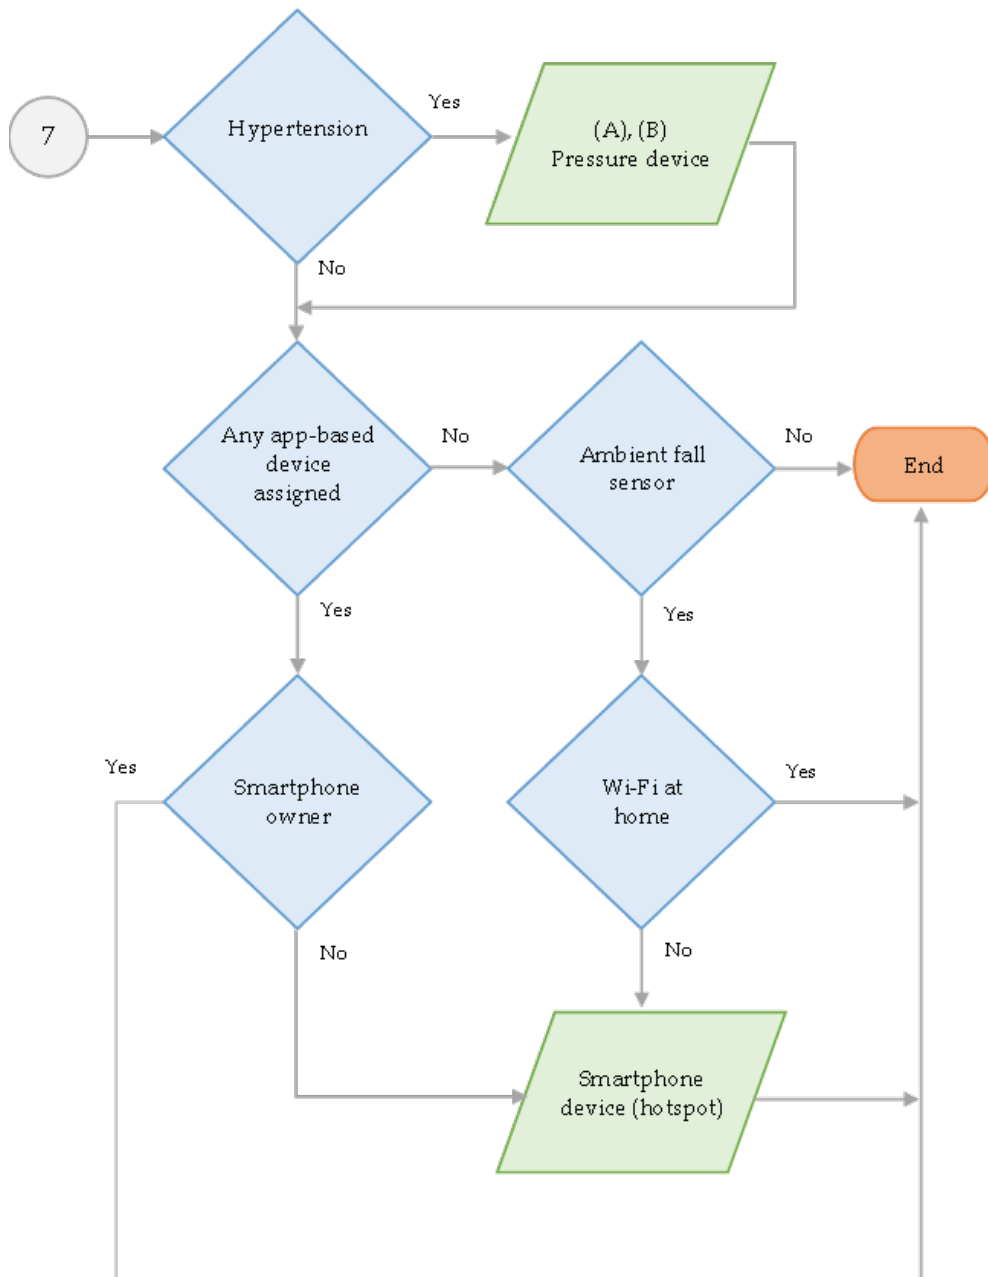

Supplement: s1 [file s1]
